# Supplementary material for: Yellow Fever in Africa: Estimating the Burden of Disease and Impact of Mass Vaccination from Outbreak and Serological Data
Source: PubMed Central journal article supplement (PMC4011853; doi:10.1371/journal.pmed.1001638), 2014-05-06
Supplement: pmed.1001638.s009.pdf [file pmed.1001638.s009.pdf]

# Yellow Fever in Africa: Estimating the burden of disease and impact of mass vaccination from outbreak and serological data

---

Supporting Table S1: Coverage and year of introduction of the yellow fever vaccine into the routine Enhanced Programme of Immunization by country.

| Country                          | Year introduced | Coverage in 2011 (%) |
|----------------------------------|-----------------|----------------------|
| Angola                           | 1991            | 64                   |
| Benin                            | 2002            | 72                   |
| Burkina Faso                     | 1987            | 82                   |
| Central African Republic         | 1989            | 62                   |
| Côte d'Ivoire                    | 1987            | 49                   |
| Cameroon                         | 2004            | 75                   |
| Democratic Republic of the Congo | 1992            | 48                   |
| Republic of Congo                | 2004            | 90                   |
| Gabon                            | 1991            | 55                   |
| Ghana                            | 1992            | 91                   |
| Guinea                           | 2002            | 56                   |
| Gambia                           | 1985            | 91                   |
| Guinea-Bissau                    | 2008            | 61                   |
| Kenya                            | 1992            | 1                    |
| Liberia                          | 2001            | 39                   |
| Mali                             | 1992            | 61                   |
| Niger                            | 1988            | 51                   |
| Nigeria                          | 1993            | 75                   |
| Senegal                          | 1987            | 81                   |
| Sierra Leone                     | 2002            | 80                   |
| Chad                             | 1992            | 33                   |
| Togo                             | 1992            | 65                   |

Source: [1]

## References

1. World Health Organization. Immunization surveillance, assessment and monitoring. [http://www.who.int/immunization\\_monitoring/data/data\\_subject/en/index.html](http://www.who.int/immunization_monitoring/data/data_subject/en/index.html). Accessed 11 June 2012.
