# Supplementary material for: Yellow Fever in Africa: Estimating the Burden of Disease and Impact of Mass Vaccination from Outbreak and Serological Data
Source: PubMed Central journal article supplement (PMC4011853; doi:10.1371/journal.pmed.1001638), 2014-05-06
Supplement: pmed.1001638.s010.pdf [file pmed.1001638.s010.pdf]

# Yellow Fever in Africa: Estimating the burden of disease and impact of mass vaccination from outbreak and serological data

---

Supporting Table S2: Covariates considered in the regression modelling, significance level in univariate models and cluster association.

| varname                                | significance | cluster |
|----------------------------------------|--------------|---------|
| longitude                              | ***          | 1       |
| latitude                               | ***          | 2       |
| altitude                               | ***          | 3       |
| mean night temperature                 | ***          | 3       |
| max night temperature                  | ***          | 3       |
| log(population)                        | ***          | 4       |
| LC: evergreen broadleaf forest         | **           | 5       |
| LC: deciduous broadleaf forest         | **           | 6       |
| LC: closed shrubland                   | ***          | 7       |
| LC: open shrublands                    | **           | 8       |
| LC: woody savannas                     | ***          | 9       |
| LC: urban and built-up                 | .            | 10      |
| LC: cropland/natural vegetation mosaic | ***          | 11      |
| LC: barren or sparsely vegetated       | *            | 12      |
| min day temperature                    | ***          | 13      |
| mean day temperature                   | ***          | 13      |
| max day temperature                    | **           | 13      |
| min night temperature                  | ***          | 14      |
| max EVI                                | ***          | 15      |
| mean EVI                               | **           | 15      |
| min MIR                                | **           | 16      |
| mean MIR                               | .            | 16      |
| max rainfall                           | ***          | 17      |
| mean rainfall                          | **           | 17      |
| min rainfall                           | *            | 18      |
| LC: water                              | -            | NA      |
| population                             | -            | NA      |
| LC: permanent wetlands                 | -            | NA      |
| LC: grasslands                         | -            | NA      |
| max MIR                                | -            | NA      |
| min EVI                                | -            | NA      |
| urban proportion                       | -            | NA      |
| LC: croplands                          | -            | NA      |
| LC: savannas                           | -            | NA      |

significance levels \*\*\*  $p < 0.001$ , \*\*  $0.001 \leq p < 0.01$ , \*  $0.01 \leq p < 0.05$ , .  $0.05 \leq p < 0.1$ , -  $p \geq 0.1$ .
